# Supplementary material
Source: ML conference proceedings conference paper supplement (https://openreview.net/forum?id=_G3Bbv1whP)
Supplement: supplementary_material [file attachment]

## A Code for Matryoshka Representation Learning 🍷 (MRL)

We use Alg 1 and 2 provided below to train supervised ResNet50–MRL models on ImageNet-1K. We provide this code as a template to extend MRL to any domain.

---

### Algorithm 1 Pytorch code for Matryoshka Cross-Entropy Loss

---

```
class Matryoshka_CE_Loss(nn.Module):
    def __init__(self, relative_importance, **kwargs):
        super(Matryoshka_CE_Loss, self).__init__()
        self.criterion = nn.CrossEntropyLoss(**kwargs)
        self.relative_importance = relative_importance # usually set
        to all ones

    def forward(self, output, target):
        loss=0
        for i in range(len(output)):
            loss+= self.relative_importance[i] * self.criterion(output[
                i], target)
        return loss
```

---

---

### Algorithm 2 Pytorch code for MRL Linear Layer

---

```
class MRL_Linear_Layer(nn.Module):
    def __init__(self, nesting_list: List, num_classes=1000, efficient=
        False, **kwargs):
        super(MRL_Linear_Layer, self).__init__()
        self.nesting_list=nesting_list # set of m in M (Eq. 1)
        self.num_classes=num_classes
        self.is_efficient=efficient # flag for MRL-E

        if not is_efficient:
            for i, num_feat in enumerate(self.nesting_list):
                setattr(self, f"nesting_classifier_{i}", nn.Linear(
                    num_feat, self.num_classes, **kwargs))
        else:
            setattr(self, "nesting_classifier_0", nn.Linear(self.
                nesting_list[-1], self.num_classes, **kwargs)) #
            Instantiating one nn.Linear layer for MRL-E

    def forward(self, x):
        nesting_logits = ()
        for i, num_feat in enumerate(self.nesting_list):
            if(self.is_efficient):
                efficient_logit = torch.matmul(x[:, :num_feat],
                    (self.nesting_classifier_0.weight[:, :
                        num_feat]).t())
            else:
                nesting_logits.append(getattr(self, f"
                    nesting_classifier_{i}")(x[:, :num_feat]))

        if(self.is_efficient):
            nesting_logits.append(efficient_logit)

        return nesting_logits
```

---

## B Datasets

**ImageNet-1K** [67] contains 1,281,167 labeled train images, and 50,000 labelled validation images across 1,000 classes. The images were transformed with standard procedures detailed by FFCV [50].

**ImageNet-4K** dataset was constructed by selecting 4,202 classes, non-overlapping with ImageNet-1K, from ImageNet-21K [16] with 1,050 or more examples. The train set contains 1,000 examples and the query/validation set contains 50 examples per class totalling to  $\sim 4.2\text{M}$  and  $\sim 200\text{K}$  respectively. We will release the list of images curated together to construct ImageNet-4K.

**JFT-300M** [76] is a large-scale multi-label dataset with 300M images labelled across 18,291 categories.

**ALIGN** [41] utilizes a large scale noisy image-text dataset containing 1.8B image-text pairs.

**ImageNet Robustness Datasets** We experimented on the following datasets to examine the robustness of MRL models:

**ImageNetV2** [64] is a collection of 10K images sampled a decade after the original construction of ImageNet [16]. ImageNetV2 contains 10 examples each from the 1,000 classes of ImageNet-1K.

**ImageNet-A** [33] contains 7.5K real-world adversarially filtered images from 200 ImageNet-1K classes.

**ImageNet-R** [32] contains 30K artistic image renditions for 200 of the original ImageNet-1K classes.

**ImageNet-Sketch** [85] contains 50K sketches, evenly distributed over all 1,000 ImageNet-1K classes.

**ObjectNet** [2] contains 50K images across 313 object classes, each containing  $\sim 160$  images each.

## C Matryoshka Representation Learning **Model Training**

We trained all ResNet50–MRL models using the efficient dataloaders of FFCV [50]. We utilized the `rn50_40_epochs.yaml` configuration file of FFCV to train all MRL models defined below:

- **MRL**: ResNet50 model with the fc layer replaced by `MRL_Linear_Layer(efficient=False)`
- **MRL-E**: ResNet50 model with the fc layer replaced by `MRL_Linear_Layer(efficient=True)`
- **FF-k**: ResNet50 model with the fc layer replaced by `torch.nn.Linear(k, num_classes)`, where  $k \in [8, 16, 32, 64, 128, 256, 512, 1024, 2048]$ . We will henceforth refer to these models as simply FF, with the k value denoting representation size.

We trained all ResNet50 models with a learning rate of 0.475 with a cyclic learning rate schedule [74]. This was after appropriate scaling ( $0.25\times$ ) of the learning rate specified in the configuration file to accommodate for 2xA100 NVIDIA GPUs available for training, compared to the 8xA100 GPUs utilized in the FFCV benchmarks. We trained with a batch size of 256 per GPU, momentum [77] of 0.9, and an SGD optimizer with a weight decay of  $1e-4$ .

Our code (Appendix A) makes minimal modifications to the training pipeline provided by FFCV to learn Matryoshka Representations.

We trained ViT-B/16 models for JFT-300M on a 8x8 cloud TPU pod [43] using Tensorflow [1] with a batchsize of 128 and trained for 300K steps. Similarly, ALIGN models were trained using Tensorflow on 8x8 cloud TPU pod for 1M steps with a batchsize of 64 per TPU. Both these models were trained with adafactor optimizer [72] with a linear learning rate decay starting at  $1e-3$ .

Lastly, we trained BERT-base model on English Wikipedia and BookCorpus. We trained our models in Tensorflow used a 4x4 cloud TPU pod with a total batchsize of 1024. We used an AdamW [54] with a linear learning rate decay starting at  $1e-4$  and trained for 450K steps.

In each of the cases, if the final representation was normalized in the FF implementation, MRL models adopted the same for each of the nesting dimension for a fair comparison.

Table 1: Top-1 classification accuracy (%) for ResNet50 models on ImageNet-1K.

| Rep. Size | Rand. LP | SVD          | FF           | Slim. Net | MRL          | MRL-E |
|-----------|----------|--------------|--------------|-----------|--------------|-------|
| 8         | 4.56     | 2.34         | 65.29        | 0.42      | <b>66.63</b> | 56.66 |
| 16        | 11.29    | 7.17         | 72.85        | 0.96      | <b>73.53</b> | 71.94 |
| 32        | 27.21    | 20.46        | 74.60        | 2.27      | <b>75.03</b> | 74.48 |
| 64        | 49.47    | 48.10        | 75.27        | 5.59      | <b>75.82</b> | 75.35 |
| 128       | 65.70    | 67.24        | 75.29        | 14.15     | <b>76.30</b> | 75.80 |
| 256       | 72.43    | 74.59        | 75.71        | 38.42     | <b>76.47</b> | 76.22 |
| 512       | 74.94    | <b>76.78</b> | 76.18        | 69.80     | 76.65        | 76.36 |
| 1024      | 76.10    | <b>76.87</b> | 76.63        | 74.61     | 76.76        | 76.48 |
| 2048      | 76.87    | –            | <b>76.87</b> | 76.26     | 76.80        | 76.51 |

## D Classification Results

We show the top-1 classification accuracy of ResNet50–MRL models on ImageNet-1K in Table 1 and Figure 2. We compare the performance of MRL models (MRL, MRL-E) to several baselines:

- **FF**: We utilize the FF- $k$  models described in Appendix C for  $k \in \{8, \dots, 2048\}$ .
- **SVD**: We performed a low rank approximation of the 1000-way classification layer of FF-2048, with rank = 1000.
- **Rand. LP**: We compared against linear classifier fit on randomly selected features [28].
- **Slim. Net**: We take the pretrained Slimmable neural networks [91] which are trained with a flexible width backbone (25%, 50%, 75% and full width). For each representation size, we take the first  $k$  dimensions for classification. Note that training of slimmable neural networks becomes unstable when trained below 25% width due to the hardness in optimization and low-complexity of the model.

At lower dimensions ( $d \leq 128$ ), MRL outperforms all baselines significantly, which indicates that pretrained models lack the multifidelity of Matryoshka Representations and are incapable of fitting accurate linear classifier for low-dimensions.

We compared the performance of MRL models at various representation sizes via 1-nearest neighbors (1-NN) image classification accuracy on ImageNet-1K in Table 2 and Figure 3. We provide detailed information regarding the  $k$ -NN search pipeline in Appendix E. We compared against a baseline of attempting to enforce nesting to a FF-2048 model by 1) Random Feature Selection (Rand. FS): considering the first  $m$  dimensions of FF-2048 for NN lookup, and 2) FF+SVD: performing SVD on the FF-2048 representations at the specified representation size. We also compared against the 1-NN accuracy of slimmable neural nets [91] as an additional baseline. We observed these baseline models to perform very poorly at lower dimensions, as they were not explicitly trained to learn Matryoshka Representations.

Table 2: 1-NN accuracy (%) on ImageNet-1K for various ResNet50 models.

| Rep. Size | FF    | Rand. FS | FF+SVD       | Slimmable | MRL          | MRL-E        |
|-----------|-------|----------|--------------|-----------|--------------|--------------|
| 8         | 58.93 | 2.36     | 19.14        | 1.00      | <b>62.19</b> | 57.45        |
| 16        | 66.77 | 12.06    | 46.02        | 5.12      | <b>67.91</b> | 67.05        |
| 32        | 68.84 | 32.91    | 60.78        | 16.95     | <b>69.46</b> | 68.60        |
| 64        | 69.41 | 49.91    | 67.04        | 35.60     | <b>70.17</b> | 69.61        |
| 128       | 69.35 | 60.91    | 69.63        | 51.16     | <b>70.52</b> | 70.12        |
| 256       | 69.72 | 65.75    | <b>70.67</b> | 60.61     | 70.62        | 70.36        |
| 512       | 70.18 | 68.77    | <b>71.06</b> | 65.82     | 70.82        | 70.74        |
| 1024      | 70.34 | 70.41    | <b>71.22</b> | 67.19     | 70.89        | 71.07        |
| 2048      | 71.19 | 71.19    | 71.21        | 66.10     | 70.97        | <b>71.21</b> |

### D.1 Adaptive Classification (MRL-AC)

In an attempt to use the smallest representation that works well for classification for every image in the ImageNet-1K validation set, we learned a policy to increase the representation size from  $m_i$  to

Table 3: Threshold-based adaptive classification performance of ResNet50 MRL on a 40K sized held-out subset of ImageNet-1K validation set.

| Expected Rep. Size | Accuracy         |
|--------------------|------------------|
| $13.57 \pm 0.95$   | $73.79 \pm 0.11$ |
| $18.86 \pm 1.53$   | $75.23 \pm 0.11$ |
| $26.18 \pm 2.02$   | $76.06 \pm 0.13$ |
| $37.19 \pm 5.02$   | $76.29 \pm 0.18$ |
| $47.21 \pm 6.21$   | $76.44 \pm 0.19$ |
| $64.79 \pm 9.00$   | $76.53 \pm 0.18$ |
| $94.32 \pm 15.87$  | $76.56 \pm 0.19$ |
| $137.04 \pm 31.01$ | $76.57 \pm 0.19$ |

$m_{i+1}$  using a 10K sized subset of the ImageNet-1K validation set. This policy is based on whether the prediction confidence  $p_i$  using representation size  $m_i$  exceeds a learned threshold  $t_i^*$ . If  $p_i \geq t_i^*$ , we used predictions from representation size  $m_i$  otherwise, we increased to representation size  $m_{i+1}$ . To learn the optimal threshold  $t_i^*$ , we performed a grid search between 0 and 1 (100 samples). For each threshold  $t$ , we computed the classification accuracy over our 10K image subset. We set  $t_i^*$  equal to the smallest threshold  $t_k$  that gave the best accuracy. We use this procedure to obtain thresholds for successive models, i.e.,  $\{t_j^* \mid j \in \{8, 16, 32, 64, \dots, 2048\}\}$

For inference, we used the remaining held-out 40K samples from the ImageNet-1K validation set. We began with smallest sized representation ( $m = 8$ ) and compared the computed prediction confidence  $p_8$  to learned optimal threshold  $t_8^*$ . If  $p_8 \leq t_8^*$ , then we increased  $m = 16$ , and repeated this procedure until  $m = d = 2048$ . To compute the expected dimensions, we performed early stopping at  $m = \{16, 32, 64, \dots, 2048\}$  and computed the expectation using the distribution of representation sizes. As shown in Table 3 and Figure 6, we observed that in expectation, we only needed a  $\sim 37$  sized representation to achieve 76.3% classification accuracy on ImageNet-1K, which is roughly  $14\times$  smaller than the FF-512 baseline. Even if we compute the expectation as weighted average over cumulative sum of representation size  $\{8, 24, 56, \dots\}$ , due to the nature of multiple linear heads for MRL, we end up with an expected size of 62 that still provides roughly  $8.2\times$  efficient representation than FF-512 baseline. However, MRL-E alleviates this extra-compute with a minimal drop in accuracy.

## D.2 JFT, ALIGN and BERT

We examine the k-NN classification accuracy of learned Matryoshka Representations via ALIGN-MRL and JFT-ViT-MRL in Table 4. For ALIGN [41], we observed that learning Matryoshka Representations via ALIGN-MRL improved classification accuracy at nearly all dimensions when compared to ALIGN. We observed a similar trend when training ViT-B/16 [22] for JFT-300M [76] classification, where learning Matryoshka Representations via MRL and MRL-E on top of JFT-ViT improved classification accuracy for nearly all dimensions, and significantly for lower ones. This demonstrates that training to learn Matryoshka Representations is feasible and extendable even for extremely large scale datasets. We also demonstrate that Matryoshka Representations are learned at interpolated dimensions for both ALIGN and JFT-ViT, as shown in Table 5, despite not being trained explicitly at these dimensions. Lastly, Table 6 shows that MRL training leads to a increase in the cosine similarity span between positive and random image-text pairs.

Table 4: ViT-B/16 and ViT-B/16-MRL top-1 and top-5 k-NN accuracy for ALIGN and JFT. Top-1 entries where MRL-E and MRL outperform baselines are bolded for both ALIGN and JFT-ViT.

| Rep. Size | ALIGN |       | ALIGN-MRL    |       | JFT-ViT |       | JFT-ViT-MRL  |       | JFT-ViT-MRL-E |       |
|-----------|-------|-------|--------------|-------|---------|-------|--------------|-------|---------------|-------|
|           | Top-1 | Top-5 | Top-1        | Top-5 | Top-1   | Top-5 | Top-1        | Top-5 | Top-1         | Top-5 |
| 12        | 11.90 | 28.05 | <b>43.57</b> | 67.36 | 27.07   | 48.57 | <b>53.61</b> | 75.30 | <b>51.54</b>  | 73.94 |
| 24        | 33.35 | 55.58 | <b>56.44</b> | 78.19 | 48.64   | 70.20 | <b>62.80</b> | 81.51 | <b>62.40</b>  | 81.36 |
| 48        | 51.32 | 73.15 | <b>62.33</b> | 82.30 | 63.58   | 81.80 | <b>67.24</b> | 84.37 | <b>66.89</b>  | 83.80 |
| 96        | 61.82 | 81.97 | <b>65.72</b> | 84.61 | 68.56   | 85.13 | <b>69.74</b> | 85.86 | <b>68.80</b>  | 85.13 |
| 192       | 66.71 | 85.27 | <b>67.00</b> | 85.36 | 71.32   | 86.21 | <b>71.34</b> | 86.62 | <b>70.41</b>  | 86.01 |
| 384       | 67.65 | 85.70 | <b>67.70</b> | 85.73 | 71.67   | 86.98 | <b>71.73</b> | 87.08 | 71.18         | 86.46 |
| 768       | 68.00 | 86.10 | 67.85        | 85.85 | 72.10   | 87.20 | 71.85        | 86.92 | 71.31         | 86.62 |

Table 5: Examining top-1 and top-5 k-NN accuracy at interpolated hidden dimensions for ALIGN and JFT. This indicates that MRL is able to scale classification accuracy as hidden dimensions increase even at dimensions that were not explicitly considered during training.

| Interpolated<br>Rep. Size | ALIGN-NRL |       | JFT-ViT-NRL |       |
|---------------------------|-----------|-------|-------------|-------|
|                           | Top-1     | Top-5 | Top-1       | Top-5 |
| 16                        | 49.06     | 72.26 | 58.35       | 78.55 |
| 32                        | 58.64     | 79.96 | 64.98       | 82.89 |
| 64                        | 63.90     | 83.39 | 68.19       | 84.85 |
| 128                       | 66.63     | 85.00 | 70.35       | 86.24 |
| 256                       | 67.10     | 85.30 | 71.57       | 86.77 |
| 512                       | 67.64     | 85.72 | 71.55       | 86.67 |

Table 6: Cosine similarity between embeddings

| Avg. Cosine Similarity | ALIGN | ALIGN-MRL |
|------------------------|-------|-----------|
| Positive Text to Image | 0.27  | 0.49      |
| Random Text to Image   | 8e-3  | -4e-03    |
| Random Image to Image  | 0.10  | 0.08      |
| Random Text to Text    | 0.22  | 0.07      |

We also evaluated the capability of Matryoshka Representations to extend to other natural language processing via masked language modeling (MLM) with BERT [19], whose results are tabulated in Table 7. Without any hyper-parameter tuning, we observed Matryoshka Representations to be within 0.5% of FF representations for BERT MLM validation accuracy. This is a promising initial result that could help with large-scale adaptive document retrieval using BERT-MRL.

Table 7: Masked Language Modelling (MLM) accuracy of FF and MRL models on the validation set.

| Rep. Size | BERT-FF | BERT-MRL |
|-----------|---------|----------|
| 12        | 60.12   | 59.92    |
| 24        | 62.49   | 62.05    |
| 48        | 63.85   | 63.40    |
| 96        | 64.32   | 64.15    |
| 192       | 64.70   | 64.58    |
| 384       | 65.03   | 64.81    |
| 768       | 65.54   | 65.00    |

## E Image Retrieval

We evaluated the strength of Matryoshka Representations via image retrieval on ImageNet-1K (the training distribution), as well as on out-of-domain datasets ImageNetV2 and ImageNet-4K for all MRL ResNet50 models. We generated the database and query sets, containing  $N$  and  $Q$  samples respectively, with a standard PyTorch [59] forward pass on each dataset. We specify the representation size at which we retrieve a shortlist of  $k$ -nearest neighbors (k-NN) by  $D_s$ . The database is a thus a  $[N, D_s]$  array, the query set is a  $[Q, D_s]$  array, and the neighbors set is a  $[Q, k]$  array. For metrics, we utilized corrected mean average precision (mAP@k) [49] and precision (P@k):  $P@k = \frac{\text{correct\_pred}}{k}$  where *correct\_pred* is the number of retrieved NN with the correct label over the entire query set using a shortlist of length  $k$ .

We performed retrieval with FAISS [42], a library for efficient similarity search. To obtain a shortlist of k-NN, we built an index to search the database. We performed an exhaustive NN search with the L2 distance metric with `faiss.IndexFlatL2`, as well as an approximate NN search (ANNS) via HNSW [42] with `faiss.IndexHNSWFlat`. We used HNSW with  $M = 32$  unless otherwise mentioned, and henceforth referred to as HNSW32. The exact search index was moved to the GPU

for fast k-NN search computation, whereas the HNSW index was kept on the CPU as it currently lacks GPU support. We show the wall clock times for building the index as well as the index size in Table 20. We observed exact search to have a smaller index size which was faster to build when compared to HNSW, which trades off a larger index footprint for fast NN search (discussed in more detail in Appendix K). The database and query vectors are normalized with `faiss.normalize_L2` before building the index and performing search.

Table 8: Retrieve a shortlist of 200-NN with  $D_s$  sized representations on ImageNet-1K via exact search with L2 distance metric. The Top-1 and mAP@10 entries where MRL-E and MRL outperform FF are bolded.

| Model            | $D_s$ | MFLOPS | Top-1        | Top-5 | Top-10 | mAP@10       | mAP@25 | mAP@50 | mAP@100 | P@10  | P@25  | P@50  | P@100 |
|------------------|-------|--------|--------------|-------|--------|--------------|--------|--------|---------|-------|-------|-------|-------|
| FF               | 8     | 10     | 58.93        | 75.76 | 80.25  | 53.42        | 52.29  | 51.84  | 51.57   | 59.32 | 59.28 | 59.25 | 59.21 |
|                  | 16    | 20     | 66.77        | 80.88 | 84.40  | 61.63        | 60.51  | 59.98  | 59.62   | 66.76 | 66.58 | 66.43 | 66.27 |
|                  | 32    | 41     | 68.84        | 82.58 | 86.14  | 63.35        | 62.08  | 61.36  | 60.76   | 68.43 | 68.13 | 67.83 | 67.48 |
|                  | 64    | 82     | 69.41        | 83.56 | 87.33  | 63.26        | 61.64  | 60.63  | 59.67   | 68.49 | 67.91 | 67.38 | 66.74 |
|                  | 128   | 164    | 69.35        | 84.23 | 88.24  | 62.30        | 60.16  | 58.73  | 57.29   | 67.84 | 66.83 | 65.96 | 64.92 |
|                  | 256   | 328    | 69.72        | 84.71 | 88.54  | 61.47        | 58.85  | 57.02  | 55.13   | 67.19 | 65.82 | 64.64 | 63.24 |
|                  | 512   | 656    | 70.18        | 85.04 | 88.91  | 61.37        | 58.41  | 56.26  | 53.98   | 67.12 | 65.49 | 64.07 | 62.35 |
|                  | 1024  | 1312   | 70.34        | 85.38 | 89.19  | 61.13        | 57.87  | 55.47  | 52.90   | 66.93 | 65.08 | 63.43 | 61.45 |
|                  | 2048  | 2624   | 71.19        | 85.66 | 89.17  | 62.90        | 60.06  | 57.99  | 55.76   | 68.46 | 66.90 | 65.52 | 63.83 |
| MRL-E            | 8     | 10     | 57.45        | 57.68 | 57.50  | 51.80        | 50.41  | 49.6   | 48.86   | 57.50 | 57.16 | 56.81 | 56.36 |
|                  | 16    | 20     | <b>67.05</b> | 66.94 | 66.79  | 61.60        | 60.36  | 59.66  | 59.04   | 66.79 | 66.53 | 66.24 | 65.87 |
|                  | 32    | 41     | 68.60        | 68.74 | 68.49  | 63.34        | 61.97  | 61.14  | 60.39   | 68.49 | 68.06 | 67.65 | 67.17 |
|                  | 64    | 82     | <b>69.61</b> | 69.28 | 68.93  | <b>63.84</b> | 62.33  | 61.43  | 60.57   | 68.93 | 68.40 | 67.96 | 67.38 |
|                  | 128   | 164    | <b>70.12</b> | 69.60 | 69.19  | <b>64.15</b> | 62.58  | 61.61  | 60.70   | 69.19 | 68.62 | 68.11 | 67.50 |
|                  | 256   | 328    | <b>70.36</b> | 69.83 | 69.36  | <b>64.35</b> | 62.76  | 61.76  | 60.82   | 69.36 | 68.79 | 68.26 | 67.63 |
|                  | 512   | 656    | <b>70.74</b> | 70.09 | 69.63  | <b>64.69</b> | 63.05  | 62.06  | 61.14   | 69.63 | 69.00 | 68.50 | 67.88 |
|                  | 1024  | 1312   | <b>71.07</b> | 70.24 | 69.78  | <b>64.85</b> | 63.22  | 62.19  | 61.26   | 69.78 | 69.16 | 68.60 | 67.99 |
|                  | 2048  | 2624   | <b>71.21</b> | 70.41 | 69.90  | <b>64.99</b> | 63.33  | 62.29  | 61.33   | 69.90 | 69.24 | 68.68 | 68.05 |
| MRL              | 8     | 10     | <b>62.19</b> | 77.05 | 81.34  | <b>56.74</b> | 55.47  | 54.76  | 54.12   | 62.06 | 61.81 | 61.54 | 61.17 |
|                  | 16    | 20     | <b>67.91</b> | 81.44 | 85.00  | <b>62.94</b> | 61.79  | 61.16  | 60.64   | 67.93 | 67.71 | 67.48 | 67.20 |
|                  | 32    | 41     | <b>69.46</b> | 83.01 | 86.30  | <b>64.21</b> | 62.96  | 62.22  | 61.58   | 69.18 | 68.87 | 68.54 | 68.17 |
|                  | 64    | 82     | <b>70.17</b> | 83.53 | 86.95  | <b>64.69</b> | 63.33  | 62.53  | 61.80   | 69.67 | 69.25 | 68.89 | 68.42 |
|                  | 128   | 164    | <b>70.52</b> | 83.98 | 87.25  | <b>64.94</b> | 63.50  | 62.63  | 61.83   | 69.93 | 69.44 | 69.02 | 68.50 |
|                  | 256   | 328    | <b>70.62</b> | 84.17 | 87.38  | <b>65.04</b> | 63.56  | 62.66  | 61.81   | 70.02 | 69.52 | 69.07 | 68.50 |
|                  | 512   | 656    | <b>70.82</b> | 84.31 | 87.55  | <b>65.14</b> | 63.57  | 62.62  | 61.73   | 70.12 | 69.53 | 69.04 | 68.45 |
|                  | 1024  | 1312   | <b>70.89</b> | 84.44 | 87.68  | <b>65.16</b> | 63.58  | 62.60  | 61.68   | 70.14 | 69.54 | 69.01 | 68.41 |
|                  | 2048  | 2624   | 70.97        | 84.41 | 87.74  | <b>65.20</b> | 63.57  | 62.56  | 61.60   | 70.18 | 69.52 | 68.98 | 68.35 |
| MRL-Interpolated | 12    | 15     | 65.89        | 80.04 | 83.68  | 60.84        | 59.66  | 58.98  | 58.37   | 65.94 | 65.72 | 65.45 | 65.08 |
|                  | 24    | 31     | 68.76        | 82.48 | 85.87  | 63.64        | 62.42  | 61.74  | 61.13   | 68.64 | 68.35 | 68.07 | 67.71 |
|                  | 48    | 61     | 69.96        | 83.40 | 86.65  | 64.58        | 63.20  | 62.42  | 61.72   | 69.53 | 69.10 | 68.75 | 68.32 |
|                  | 96    | 123    | 70.40        | 83.83 | 87.04  | 64.86        | 63.46  | 62.62  | 61.84   | 69.82 | 69.38 | 68.98 | 68.48 |
|                  | 192   | 246    | 70.64        | 84.09 | 87.37  | 65.00        | 63.53  | 62.66  | 61.83   | 69.98 | 69.49 | 69.05 | 68.50 |
|                  | 384   | 492    | 70.69        | 84.25 | 87.41  | 65.09        | 63.56  | 62.64  | 61.76   | 70.05 | 69.51 | 69.04 | 68.46 |
|                  | 768   | 984    | 70.84        | 84.40 | 87.63  | 65.16        | 63.59  | 62.62  | 61.71   | 70.14 | 69.55 | 69.03 | 68.44 |
|                  | 1536  | 1968   | 70.88        | 84.39 | 87.71  | 65.18        | 63.59  | 62.58  | 61.64   | 70.16 | 69.54 | 68.99 | 68.38 |

Retrieval performance on ImageNet-1K, *i.e.* the training distribution, is shown in Table 8. MRL outperforms FF models for nearly all representation size for both top-1 and mAP@10, and especially at low representation size ( $D_s \leq 32$ ). MRL-E loses out to FF significantly only at  $D_s = 8$ . This indicates that training ResNet50 models via the MRL training paradigm improves retrieval at low representation size over models explicitly trained at those representation size (FF-8...2048).

We carried out all retrieval experiments at  $D_s \in \{8, 16, 32, 64, 128, 256, 512, 1024, 2048\}$ , as these were the representation sizes which were a part of the `nesting_list` at which losses were added during training, as seen in Algorithm 1, Appendix A. To examine whether MRL is able to learn Matryoshka Representations at dimensions in between the representation size for which it was trained, we also tabulate the performance of MRL at interpolated  $D_s \in \{12, 24, 48, 96, 192, 384, 768, 1536\}$  as MRL-Interpolated. We observed that performance scaled nearly monotonically between the original representation size and the interpolated representation size as we increase  $D_s$ , which demonstrates that MRL is able to learn Matryoshka Representations at nearly all representation size  $m \in [8, 2048]$  despite optimizing only for  $|\mathcal{M}|$  nested representation sizes.

We examined the robustness of MRL for retrieval on out-of-domain datasets ImageNetV2 and ImageNet-4K, as shown in Table 9 and Table 10 respectively. On ImageNetV2, we observed that MRL outperformed FF at all  $D_s$  on top-1 Accuracy and mAP@10, and MRL-E outperformed FF at all  $D_s$  except  $D_s = 8$ . This demonstrates the robustness of the learned Matryoshka Representations for out-of-domain image retrieval.



Table 9: Retrieve a shortlist of 200-NN with  $D_s$  sized representations on ImageNetV2 via exact search with L2 distance metric. Top-1 and mAP@10 entries where MRL-E outperforms FF are bolded. MRL outperforms FF at all  $D_s$  and is thus not bolded.

| Config | $D_s$ | MFLOPs | Top-1        | Top-5 | Top-10 | mAP@10       | mAP@25 | mAP@50 | mAP@100 | P@10  | P@25  | P@50  | P@100 |
|--------|-------|--------|--------------|-------|--------|--------------|--------|--------|---------|-------|-------|-------|-------|
| FF     | 8     | 10     | 48.79        | 64.70 | 69.72  | 43.04        | 41.89  | 41.42  | 41.17   | 48.43 | 48.27 | 48.25 | 48.19 |
|        | 16    | 20     | 55.08        | 69.50 | 74.08  | 49.63        | 48.53  | 48.06  | 47.75   | 54.76 | 54.64 | 54.53 | 54.39 |
|        | 32    | 41     | 56.69        | 71.10 | 76.47  | 51.11        | 49.85  | 49.17  | 48.65   | 56.23 | 55.96 | 55.71 | 55.42 |
|        | 64    | 82     | 57.37        | 72.71 | 77.48  | 51.28        | 49.75  | 48.85  | 47.99   | 56.65 | 56.14 | 55.71 | 55.15 |
|        | 128   | 164    | 57.17        | 73.31 | 78.64  | 50.07        | 48.09  | 46.79  | 45.58   | 55.75 | 54.89 | 54.12 | 53.28 |
|        | 256   | 328    | 57.09        | 74.04 | 79.24  | 49.11        | 46.66  | 44.99  | 43.35   | 55.02 | 53.77 | 52.74 | 51.53 |
|        | 512   | 656    | 57.12        | 73.91 | 79.32  | 48.95        | 46.25  | 44.37  | 42.42   | 54.88 | 53.49 | 52.29 | 50.83 |
|        | 1024  | 1312   | 57.53        | 74.17 | 79.55  | 48.27        | 45.41  | 43.36  | 41.26   | 54.31 | 52.84 | 51.49 | 49.87 |
|        | 2048  | 2624   | 57.84        | 74.59 | 79.45  | 49.99        | 47.47  | 45.66  | 43.87   | 55.89 | 54.63 | 53.45 | 52.12 |
| MRL-E  | 8     | 10     | 47.05        | 62.53 | 67.60  | 40.79        | 39.47  | 38.78  | 38.16   | 46.03 | 45.77 | 45.54 | 45.17 |
|        | 16    | 20     | <b>55.73</b> | 70.54 | 74.86  | <b>49.86</b> | 48.57  | 47.84  | 47.26   | 54.97 | 54.71 | 54.44 | 54.10 |
|        | 32    | 41     | <b>57.33</b> | 71.61 | 76.64  | <b>51.26</b> | 49.92  | 49.09  | 48.42   | 56.46 | 56.11 | 55.70 | 55.30 |
|        | 64    | 82     | <b>57.90</b> | 72.55 | 77.44  | <b>51.89</b> | 50.29  | 49.34  | 48.53   | 57.06 | 56.45 | 55.97 | 55.43 |
|        | 128   | 164    | <b>57.73</b> | 72.79 | 77.28  | <b>52.02</b> | 50.38  | 49.49  | 48.62   | 57.13 | 56.58 | 56.15 | 55.58 |
|        | 256   | 328    | <b>58.22</b> | 72.77 | 77.67  | <b>52.16</b> | 50.61  | 49.67  | 48.81   | 57.30 | 56.79 | 56.33 | 55.77 |
|        | 512   | 656    | <b>58.46</b> | 73.00 | 77.88  | <b>52.52</b> | 50.97  | 50.02  | 49.16   | 57.65 | 57.10 | 56.64 | 56.08 |
|        | 1024  | 1312   | <b>58.71</b> | 73.29 | 78.00  | <b>52.70</b> | 51.13  | 50.17  | 49.30   | 57.83 | 57.26 | 56.77 | 56.20 |
|        | 2048  | 2624   | <b>58.86</b> | 73.17 | 78.00  | <b>52.88</b> | 51.25  | 50.26  | 49.36   | 57.95 | 57.35 | 56.85 | 56.25 |
| MRL    | 8     | 10     | 50.41        | 65.56 | 70.27  | 45.51        | 44.38  | 43.71  | 43.17   | 50.55 | 50.44 | 50.17 | 49.91 |
|        | 16    | 20     | 56.64        | 70.19 | 74.61  | 50.98        | 49.76  | 49.16  | 48.69   | 55.90 | 55.66 | 55.52 | 55.29 |
|        | 32    | 41     | 57.96        | 71.88 | 76.41  | 52.06        | 50.78  | 50.09  | 49.54   | 57.18 | 56.83 | 56.57 | 56.27 |
|        | 64    | 82     | 58.94        | 72.74 | 77.17  | 52.65        | 51.24  | 50.44  | 49.76   | 57.72 | 57.29 | 56.94 | 56.52 |
|        | 128   | 164    | 59.13        | 73.07 | 77.49  | 52.94        | 51.42  | 50.53  | 49.74   | 58.00 | 57.47 | 57.05 | 56.55 |
|        | 256   | 328    | 59.18        | 73.64 | 77.75  | 52.96        | 51.45  | 50.52  | 49.70   | 58.01 | 57.53 | 57.06 | 56.54 |
|        | 512   | 656    | 59.40        | 73.85 | 77.97  | 53.01        | 51.39  | 50.46  | 49.61   | 58.11 | 57.49 | 57.04 | 56.48 |
|        | 1024  | 1312   | 59.11        | 73.77 | 77.92  | 52.98        | 51.37  | 50.40  | 49.54   | 58.13 | 57.51 | 57.00 | 56.45 |
|        | 2048  | 2624   | 59.63        | 73.84 | 77.97  | 52.96        | 51.34  | 50.34  | 49.44   | 58.07 | 57.48 | 56.95 | 56.36 |

Table 10: Retrieve a shortlist of 200-NN with  $D_s$  sized representations on ImageNet-4K via exact search with L2 distance metric. MRL-E and FF models are omitted for clarity and compute/inference time costs.

| Config           | $D_s$ | MFLOPs | Top-1 | Top-5 | Top-10 | mAP@10 | mAP@25 | mAP@50 | mAP@100 | P@10  | P@25  | P@50  | P@100 |
|------------------|-------|--------|-------|-------|--------|--------|--------|--------|---------|-------|-------|-------|-------|
| MRL              | 8     | 34     | 10.60 | 26.23 | 35.57  | 5.32   | 4.29   | 3.76   | 3.36    | 9.13  | 8.77  | 8.46  | 8.13  |
|                  | 16    | 67     | 16.74 | 36.91 | 47.28  | 8.64   | 6.83   | 5.84   | 5.05    | 13.82 | 12.79 | 12.04 | 13.27 |
|                  | 32    | 134    | 21.54 | 43.75 | 54.11  | 11.36  | 8.88   | 7.47   | 6.31    | 17.25 | 15.67 | 14.47 | 13.27 |
|                  | 64    | 269    | 25.00 | 47.97 | 58.25  | 13.38  | 10.40  | 8.67   | 7.23    | 19.68 | 17.64 | 16.14 | 14.65 |
|                  | 128   | 538    | 27.27 | 50.35 | 60.47  | 14.77  | 11.47  | 9.53   | 7.91    | 21.25 | 18.95 | 17.26 | 15.59 |
|                  | 256   | 1076   | 28.53 | 51.95 | 61.90  | 15.66  | 12.19  | 10.12  | 8.38    | 22.28 | 19.81 | 18.01 | 16.22 |
|                  | 512   | 2151   | 29.46 | 53.03 | 62.81  | 16.29  | 12.70  | 10.55  | 8.72    | 22.96 | 20.42 | 18.54 | 16.68 |
|                  | 1024  | 4303   | 30.23 | 53.72 | 63.45  | 16.76  | 13.08  | 10.86  | 8.97    | 23.48 | 20.88 | 18.93 | 17.00 |
|                  | 2048  | 8606   | 30.87 | 54.32 | 64.02  | 17.20  | 13.43  | 11.14  | 9.19    | 23.97 | 21.28 | 19.28 | 17.30 |
| MRL-Interpolated | 12    | 50     | 14.04 | 32.56 | 42.71  | 7.16   | 5.70   | 4.92   | 4.32    | 11.81 | 11.08 | 10.52 | 9.94  |
|                  | 24    | 101    | 19.49 | 40.82 | 51.26  | 10.17  | 7.98   | 6.75   | 5.75    | 15.76 | 14.43 | 13.42 | 12.40 |
|                  | 48    | 202    | 23.51 | 46.23 | 56.56  | 12.49  | 9.72   | 8.13   | 6.81    | 18.62 | 16.75 | 15.39 | 14.04 |
|                  | 96    | 403    | 26.25 | 49.32 | 59.48  | 14.15  | 11.00  | 9.15   | 7.61    | 20.55 | 18.36 | 16.78 | 15.17 |
|                  | 192   | 807    | 27.94 | 51.32 | 61.32  | 15.29  | 11.89  | 9.88   | 8.18    | 21.86 | 19.46 | 17.71 | 15.96 |
|                  | 384   | 1614   | 29.03 | 52.53 | 62.45  | 15.99  | 12.46  | 10.35  | 8.56    | 22.64 | 20.14 | 18.29 | 16.47 |
|                  | 768   | 3227   | 29.87 | 53.36 | 63.13  | 16.54  | 12.90  | 10.71  | 8.85    | 23.23 | 20.67 | 18.75 | 16.85 |
|                  | 1536  | 6454   | 30.52 | 54.02 | 63.79  | 16.99  | 13.27  | 11.01  | 9.08    | 23.73 | 21.09 | 19.12 | 17.16 |

## F Adaptive Retrieval

The time complexity of retrieving a shortlist of k-NN often scales as  $O(d)$ , where  $d = D_s$ , for a fixed k and  $N$ . We thus will have a theoretical  $256\times$  higher cost for  $D_s = 2048$  over  $D_s = 8$ . We discuss search complexity in more detail in Appendix I. In an attempt to replicate performance at higher  $D_s$  while using less FLOPs, we perform adaptive retrieval via retrieving a k-NN shortlist with representation size  $D_s$ , and then reranking the shortlist with representations of representation size  $= D_r$ . Adaptive retrieval for a shortlist length  $k = 200$  is shown in Table 11 for ImageNet-1K, and in Table 12 for ImageNet-4K. On ImageNet-1K, we are able to achieve comparable performance to retrieval with  $D_s = 2048$  (from Table 8) with  $D_s = 16$  at  $128\times$  less MFLOPs/Query (interchangeably used with MFLOPs). Similarly, on ImageNet-4K, we are able to achieve comparable performance to retrieval with  $D_s = 2048$  (from Table 10) with  $D_s = 64$  on ImageNet-1K and ImageNet-4K, at  $32\times$  less MFLOPs. This demonstrates the value of intelligent routing techniques which utilize appropriately sized Matryoshka Representations for retrieval.

Table 11: Retrieve a shortlist of k-NN with  $D_s$  sized representations on ImageNet-1K with MRL representations, and then re-order the neighbors shortlist with L2 distances using  $D_r$  sized representations. Top-1 and mAP@10 entries that are within 0.1% of the maximum value achievable without reranking on MRL representations, as seen in Table 8, are bolded.

|                        | $D_s$ | $D_r$ | MFLOPs | Top-1        | mAP@10       | mAP@25 | mAP@50 | mAP@100 | P@10  | P@25  | P@50  | P@100 |
|------------------------|-------|-------|--------|--------------|--------------|--------|--------|---------|-------|-------|-------|-------|
| Shortlist Length = 200 | 8     | 16    | 10     | 68.21        | 63.35        | 62.25  | 61.70  | 61.19   | 68.32 | 68.14 | 67.96 | 67.65 |
|                        |       | 32    |        | 69.42        | 64.12        | 62.81  | 62.03  | 61.32   | 69.04 | 68.63 | 68.22 | 67.71 |
|                        |       | 64    |        | 70.05        | 64.46        | 63.03  | 62.14  | 61.29   | 69.37 | 68.83 | 68.32 | 67.66 |
|                        |       | 128   |        | 70.34        | 64.68        | 63.16  | 62.21  | 61.27   | 69.59 | 68.96 | 68.38 | 67.65 |
|                        |       | 256   |        | 70.40        | 64.77        | 63.21  | 62.23  | 61.26   | 69.66 | 69.02 | 68.41 | 67.65 |
|                        |       | 512   |        | 70.60        | 64.86        | 63.22  | 62.21  | 61.22   | 69.74 | 69.02 | 68.39 | 67.62 |
|                        |       | 1024  |        | 70.71        | 64.88        | 63.23  | 62.20  | 61.20   | 69.76 | 69.01 | 68.39 | 67.60 |
|                        |       | 2048  |        | 70.81        | 64.90        | 63.22  | 62.17  | 61.16   | 69.77 | 68.99 | 68.36 | 67.57 |
|                        | 16    | 32    | 21     | 69.47        | 64.27        | 63.04  | 62.36  | 61.75   | 69.21 | 68.90 | 68.58 | 68.12 |
|                        |       | 64    |        | 70.16        | 64.74        | 63.42  | 62.66  | 61.94   | 69.66 | 69.22 | 68.81 | 68.22 |
|                        |       | 128   |        | 70.52        | 65.00        | 63.60  | 62.77  | 61.98   | 69.91 | 69.36 | 68.89 | 68.24 |
|                        |       | 256   |        | 70.55        | <b>65.10</b> | 63.67  | 62.82  | 62.01   | 69.98 | 69.43 | 68.92 | 68.25 |
|                        |       | 512   |        | 70.74        | <b>65.21</b> | 63.70  | 62.83  | 62.00   | 70.08 | 69.43 | 68.92 | 68.24 |
|                        |       | 1024  |        | 70.83        | <b>65.23</b> | 63.72  | 62.83  | 61.99   | 70.08 | 69.45 | 68.92 | 68.23 |
|                        |       | 2048  |        | <b>70.90</b> | <b>65.27</b> | 63.73  | 62.82  | 61.97   | 70.10 | 69.44 | 68.90 | 68.21 |
|                        | 32    | 64    | 41     | 70.16        | 64.69        | 63.35  | 62.57  | 61.93   | 69.68 | 69.26 | 68.92 | 68.51 |
|                        |       | 128   |        | 70.52        | 64.97        | 63.54  | 62.73  | 62.04   | 69.95 | 69.47 | 69.06 | 68.59 |
|                        |       | 256   |        | 70.63        | 65.07        | 63.63  | 62.79  | 62.07   | 70.04 | 69.55 | 69.12 | 68.61 |
|                        |       | 512   |        | 70.82        | <b>65.17</b> | 63.66  | 62.80  | 62.06   | 70.11 | 69.57 | 69.12 | 68.60 |
|                        |       | 1024  |        | <b>70.89</b> | <b>65.20</b> | 63.68  | 62.80  | 62.04   | 70.15 | 69.59 | 69.12 | 68.59 |
|                        |       | 2048  |        | <b>70.97</b> | <b>65.24</b> | 63.70  | 62.79  | 62.02   | 70.19 | 69.59 | 69.10 | 68.56 |
|                        | 64    | 128   | 82     | 70.51        | 64.94        | 63.50  | 62.64  | 61.88   | 69.94 | 69.44 | 69.02 | 68.54 |
|                        |       | 256   |        | 70.63        | 65.04        | 63.57  | 62.69  | 61.91   | 70.02 | 69.52 | 69.08 | 68.57 |
|                        |       | 512   |        | 70.83        | <b>65.14</b> | 63.59  | 62.67  | 61.87   | 70.12 | 69.54 | 69.06 | 68.54 |
|                        |       | 1024  |        | <b>70.89</b> | <b>65.16</b> | 63.59  | 62.65  | 61.85   | 70.15 | 69.54 | 69.05 | 68.52 |
|                        |       | 2048  |        | <b>70.97</b> | <b>65.20</b> | 63.59  | 62.63  | 61.82   | 70.18 | 69.53 | 69.03 | 68.49 |
|                        | 128   | 256   | 164    | 70.63        | 65.04        | 63.56  | 62.66  | 61.82   | 70.02 | 69.52 | 69.07 | 68.51 |
|                        |       | 512   |        | 70.82        | <b>65.14</b> | 63.58  | 62.63  | 61.77   | 70.11 | 69.54 | 69.04 | 68.47 |
|                        |       | 1024  |        | <b>70.89</b> | <b>65.16</b> | 63.58  | 62.60  | 61.73   | 70.14 | 69.54 | 69.02 | 68.45 |
|                        |       | 2048  |        | <b>70.97</b> | <b>65.20</b> | 63.57  | 62.57  | 61.68   | 70.18 | 69.52 | 68.99 | 68.41 |
|                        | 256   | 512   | 328    | 70.82        | <b>65.14</b> | 63.57  | 62.62  | 61.74   | 70.12 | 69.53 | 69.04 | 68.45 |
|                        |       | 1024  |        | <b>70.88</b> | <b>65.16</b> | 63.58  | 62.60  | 61.69   | 70.14 | 69.54 | 69.01 | 68.41 |
|                        |       | 2048  |        | <b>70.97</b> | <b>65.20</b> | 63.56  | 62.56  | 61.62   | 70.18 | 69.52 | 68.98 | 68.37 |
|                        | 512   | 1024  | 656    | <b>70.90</b> | <b>65.16</b> | 63.58  | 62.60  | 61.68   | 70.14 | 69.54 | 69.01 | 68.41 |
|                        |       | 2048  |        | <b>70.98</b> | <b>65.20</b> | 63.57  | 62.56  | 61.60   | 70.18 | 69.52 | 68.98 | 68.35 |
|                        | 1024  | 2048  | 1312   | <b>70.97</b> | <b>65.20</b> | 63.57  | 62.56  | 61.60   | 70.18 | 69.52 | 68.98 | 68.35 |

**Funnel Retrieval.** We also designed a simple cascade policy which we call funnel retrieval to successively improve and refine the k-NN shortlist at increasing  $D_s$ . This is an attempt to remove the dependence on manual choice of  $D_s$  &  $D_r$ . We retrieved a shortlist at  $D_s$  and then re-ranked the shortlist five times while simultaneously increasing  $D_r$  (shortlist cascade) and decreasing the shortlist length (cascade list), which resembles a funnel structure. We tabulate the performance of funnel retrieval in various configurations in Table 13 on ImageNet-1K, and in Table 14 on ImageNet-4K. With funnel retrieval on ImageNet-1K, we were able to achieve top-1 accuracy within 0.1% of retrieval with  $D_s = 2048$  (as in Table 8) with a funnel with  $D_s = 16$ , with  $128\times$  less MFLOPs. Similarly, we are able to achieve equivalent top-1 accuracy within 0.15% of retrieval at  $D_s = 2048$  (as in Table 10) with funnel retrieval at  $D_s = 32$  on ImageNet-4K, with  $64\times$  less MFLOPs. This demonstrates that with funnel retrieval, we can emulate the performance of retrieval with  $D_s = 2048$  with a fraction of the MFLOPs.

## G Few-shot and Sample Efficiency

We compare MRL, MRL-E, and FF on various benchmarks to observe the effect of representation size on sample efficiency. We use Nearest Class Means [70] for classification which has been shown to be effective in the few-shot regime [13].

**ImageNetV2.** Representations are evaluated on ImageNetV2 with the n-shot k-way setup. ImageNetV2 is a dataset traditionally used to evaluate the robustness of models to natural distribution shifts. For our experiments we evaluate accuracy of the model given  $n$  examples from the ImageNetV2 distribution. We benchmark representations in the traditional small-scale (10-way) and



Table 12: Retrieve a shortlist of k-NN with  $D_s$  sized representations on ImageNet-4K with MRL representations, and then re-order the neighbors shortlist with L2 distances using  $D_r$  sized representations. Top-1 and mAP@10 entries that are within 0.1% of the maximum value achievable without reranking on MRL representations, as seen in Table 10, are bolded.

|                        | $D_s$ | $D_r$ | MFLOPs | Top-1        | mAP@10       | mAP@25 | mAP@50 | mAP@100 | P@10  | P@25  | P@50  | P@100 |
|------------------------|-------|-------|--------|--------------|--------------|--------|--------|---------|-------|-------|-------|-------|
| Shortlist Length = 200 | 8     | 16    | 34     | 16.84        | 8.70         | 6.88   | 5.88   | 5.08    | 13.86 | 12.80 | 11.98 | 11.10 |
|                        |       | 32    |        | 20.73        | 10.66        | 8.19   | 6.77   | 5.61    | 16.18 | 14.39 | 13.02 | 11.61 |
|                        |       | 64    |        | 23.11        | 11.91        | 9.03   | 7.36   | 6.00    | 17.56 | 15.34 | 13.67 | 11.99 |
|                        |       | 128   |        | 24.63        | 12.71        | 9.59   | 7.76   | 6.25    | 18.42 | 15.94 | 14.08 | 12.22 |
|                        |       | 256   |        | 25.5         | 13.24        | 9.96   | 8.03   | 6.42    | 19.00 | 16.35 | 14.36 | 12.37 |
|                        |       | 512   |        | 26.07        | 13.59        | 10.21  | 8.20   | 6.53    | 19.37 | 16.62 | 14.54 | 12.46 |
|                        |       | 1024  |        | 26.52        | 13.85        | 10.40  | 8.34   | 6.61    | 19.65 | 16.80 | 14.68 | 12.53 |
|                        |       | 2048  |        | 26.94        | 14.11        | 10.57  | 8.45   | 6.68    | 19.92 | 16.98 | 14.79 | 12.58 |
|                        | 16    | 32    | 67     | 21.44        | 11.24        | 8.72   | 7.26   | 6.02    | 17.02 | 15.30 | 13.92 | 12.41 |
|                        |       | 64    |        | 24.36        | 12.78        | 9.75   | 7.96   | 6.43    | 18.72 | 16.41 | 14.63 | 12.74 |
|                        |       | 128   |        | 26.08        | 13.70        | 10.39  | 8.39   | 6.69    | 19.68 | 17.07 | 15.05 | 12.94 |
|                        |       | 256   |        | 26.99        | 14.27        | 10.79  | 8.67   | 6.85    | 20.27 | 17.48 | 15.31 | 13.07 |
|                        |       | 512   |        | 27.60        | 14.66        | 11.06  | 8.86   | 6.97    | 20.67 | 17.75 | 15.50 | 13.16 |
|                        |       | 1024  |        | 28.12        | 14.94        | 11.26  | 8.99   | 7.05    | 20.96 | 17.95 | 15.62 | 13.22 |
|                        |       | 2048  |        | 28.56        | 15.21        | 11.43  | 9.11   | 7.12    | 21.23 | 18.13 | 15.73 | 13.27 |
|                        | 32    | 64    | 134    | 24.99        | 13.35        | 10.35  | 8.59   | 7.09    | 19.61 | 17.52 | 15.92 | 14.21 |
|                        |       | 128   |        | 27.17        | 14.61        | 11.27  | 9.26   | 7.51    | 20.99 | 18.52 | 16.62 | 14.59 |
|                        |       | 256   |        | 28.33        | 15.37        | 11.83  | 9.67   | 7.77    | 21.80 | 19.12 | 17.05 | 14.81 |
|                        |       | 512   |        | 29.12        | 15.88        | 12.20  | 9.94   | 7.93    | 22.33 | 19.51 | 17.32 | 14.94 |
|                        |       | 1024  |        | 29.78        | 16.25        | 12.47  | 10.13  | 8.05    | 22.71 | 19.79 | 17.5  | 15.03 |
|                        |       | 2048  |        | 30.33        | 16.59        | 12.72  | 10.30  | 8.16    | 23.07 | 20.05 | 17.66 | 15.11 |
|                        | 64    | 128   | 269    | 27.27        | 14.76        | 11.47  | 9.51   | 7.85    | 21.25 | 18.92 | 17.20 | 15.40 |
|                        |       | 256   |        | 28.54        | 15.64        | 12.15  | 10.05  | 8.21    | 22.24 | 19.71 | 17.81 | 15.76 |
|                        |       | 512   |        | 29.45        | 16.25        | 12.62  | 10.40  | 8.44    | 22.88 | 20.24 | 18.20 | 15.97 |
|                        |       | 1024  |        | 30.19        | 16.69        | 12.96  | 10.66  | 8.60    | 23.35 | 20.61 | 18.46 | 16.10 |
|                        |       | 2048  |        | <b>30.81</b> | <b>17.10</b> | 13.27  | 10.88  | 8.74    | 23.79 | 20.93 | 18.69 | 16.21 |
|                        | 128   | 256   | 538    | 28.54        | 15.66        | 12.19  | 10.12  | 8.36    | 22.28 | 19.81 | 18.00 | 16.16 |
|                        |       | 512   |        | 29.45        | 16.29        | 12.69  | 10.53  | 8.66    | 22.96 | 20.41 | 18.50 | 16.48 |
|                        |       | 1024  |        | 30.22        | 16.76        | 13.07  | 10.83  | 8.86    | 23.47 | 20.84 | 18.83 | 16.68 |
|                        |       | 2048  |        | <b>30.86</b> | <b>17.19</b> | 13.41  | 11.09  | 9.03    | 23.95 | 21.22 | 19.12 | 16.84 |
|                        | 256   | 512   | 1076   | 29.45        | 16.29        | 12.70  | 10.55  | 8.71    | 22.97 | 20.42 | 18.54 | 16.66 |
|                        |       | 1024  |        | 30.21        | 16.76        | 13.08  | 10.86  | 8.95    | 23.48 | 20.87 | 18.92 | 16.94 |
|                        |       | 2048  |        | <b>30.85</b> | <b>17.20</b> | 13.43  | 11.14  | 9.15    | 23.97 | 21.27 | 19.26 | 17.16 |
|                        | 512   | 1024  | 2152   | 30.22        | 16.76        | 13.08  | 10.86  | 8.97    | 23.48 | 20.88 | 18.93 | 17.00 |
|                        |       | 2048  |        | <b>30.87</b> | <b>17.20</b> | 13.43  | 11.14  | 9.19    | 23.97 | 21.28 | 19.28 | 17.28 |
|                        |       | 2048  |        | <b>30.87</b> | <b>17.20</b> | 13.43  | 11.15  | 9.19    | 23.97 | 21.28 | 19.28 | 17.29 |

Table 13: Retrieve a shortlist of k-NN with  $D_s$  sized representations on ImageNet-1K with MRL. This shortlist is then reranked with funnel retrieval, which uses a rerank cascade with a one-to-one mapping with a monotonically decreasing shortlist length as shown in the shortlist cascade. Top-1 and mAP@10 entries within 0.1% of the maximum achievable without reranking on MRL representations, as seen in Table 8, are bolded.

| $D_s$ | Rerank Cascade      | Cascade List      | MFLOPs | Top-1        | Top-5 | Top-10 | mAP@10       | P@10  |
|-------|---------------------|-------------------|--------|--------------|-------|--------|--------------|-------|
| 8     | 16→32→64→128→2048   | 200→100→50→25→10  | 10.28  | 70.22        | 82.63 | 85.49  | 64.06        | 68.65 |
|       |                     | 400→200→50→25→10  | 10.29  | 70.46        | 83.13 | 86.08  | 64.43        | 69.10 |
|       |                     | 800→400→200→50→10 | 10.31  | 70.58        | 83.54 | 86.53  | 64.62        | 69.37 |
| 16    | 32→64→128→256→2048  | 200→100→50→25→10  | 20.54  | <b>70.90</b> | 83.96 | 86.85  | <b>65.19</b> | 69.97 |
|       |                     | 400→200→50→25→10  | 20.56  | <b>70.95</b> | 84.05 | 87.04  | <b>65.18</b> | 70.00 |
|       |                     | 800→400→200→50→10 | 20.61  | <b>70.96</b> | 84.18 | 87.22  | <b>65.14</b> | 70.01 |
| 32    | 64→128→256→512→2048 | 200→100→50→25→10  | 41.07  | <b>70.96</b> | 84.32 | 87.47  | <b>65.21</b> | 70.11 |
|       |                     | 400→200→50→25→10  | 41.09  | <b>70.97</b> | 84.32 | 87.47  | <b>65.19</b> | 70.11 |
|       |                     | 800→400→200→50→10 | 41.20  | <b>70.97</b> | 84.36 | 87.53  | <b>65.18</b> | 70.11 |

large-scale (1000-way) setting. We evaluate for  $n \in 1, 3, 5, 7, 9$  with 9 being the maximum value for  $n$  because there are 10 images per class.

We observe that MRL has equal performance to FF across all representation sizes and shot numbers. We also find that for both MRL and FF as the shot number decreases, the required representation size to reach optimal accuracy decreases (Table 15). For example, we observe that 1-shot performance at 32 representation size has equal accuracy to 2048 representation size.

**FLUID.** For the long-tailed setting we evaluate MRL on the FLUID benchmark [83] which contains a mixture of pretrain and new classes. Table 16 shows the evaluation of the learned representation

Table 14: Retrieve a shortlist of k-NN with  $D_s$  sized representations on ImageNet-4K with MRL. This shortlist is then reranked with funnel retrieval, which uses a rerank cascade with a one-to-one mapping with a monotonically decreasing shortlist length as shown in the shortlist cascade. Top-1 and mAP@10 entries within 0.15% of the maximum achievable without reranking on MRL representations, as seen in Table 8, are bolded.

| $D_s$ | Rerank Cascade        | Cascade List      | MFLOPs | Top-1        | Top-5 | Top-10 | mAP@10 | P@10  |
|-------|-----------------------|-------------------|--------|--------------|-------|--------|--------|-------|
| 8     | 16→32→64→128→2048     | 200→100→50→25→10  | 33.65  | 26.20        | 46.45 | 54.12  | 12.79  | 17.85 |
|       |                       | 400→200→50→25→10  | 33.66  | 26.55        | 47.02 | 54.72  | 13.02  | 18.15 |
|       |                       | 800→400→200→50→10 | 33.68  | 26.83        | 47.54 | 55.35  | 13.24  | 18.44 |
| 16    | 32→64→128→256→2048    | 200→100→50→25→10  | 67.28  | 29.51        | 51.44 | 59.56  | 15.27  | 21.03 |
|       |                       | 400→200→50→25→10  | 67.29  | 29.66        | 51.71 | 59.88  | 15.42  | 21.22 |
|       |                       | 800→400→200→50→10 | 67.34  | 29.79        | 52.00 | 60.25  | 15.55  | 21.41 |
| 32    | 64→128→256→512→2048   | 200→100→50→25→10  | 134.54 | 30.64        | 53.52 | 62.16  | 16.45  | 22.64 |
|       |                       | 400→200→50→25→10  | 134.56 | 30.69        | 53.65 | 62.31  | 16.51  | 22.73 |
|       |                       | 800→400→200→50→10 | 134.66 | <b>30.72</b> | 53.78 | 62.43  | 16.55  | 22.79 |
| 64    | 128→256→512→1024→2048 | 200→100→50→25→10  | 269.05 | <b>30.81</b> | 54.06 | 63.15  | 16.87  | 23.34 |
|       |                       | 400→200→50→25→10  | 269.10 | <b>30.84</b> | 54.20 | 63.31  | 16.92  | 23.42 |
|       |                       | 800→400→200→50→10 | 269.31 | <b>30.87</b> | 54.27 | 63.42  | 16.95  | 23.46 |

Table 15: Few-shot accuracy on ImageNetV2 for 1000 way classification. MRL performs equally to FF across all shots and representation sizes. We also observe that accuracy saturates at a lower dimension for lower shot numbers. For example, at 1-shot 32-dim. performs equally to 2048-dim.

| Rep. Size | Method | 1-Shot | 3-Shot | 5-Shot | 7-Shot | 9-Shot |
|-----------|--------|--------|--------|--------|--------|--------|
| 8         | FF     | 35.41  | 45.73  | 49.23  | 50.89  | 51.72  |
|           | MH     | 35.37  | 45.69  | 49.25  | 50.85  | 51.73  |
| 16        | FF     | 40.88  | 53.96  | 57.36  | 58.72  | 59.39  |
|           | MH     | 40.90  | 53.94  | 57.37  | 58.65  | 59.29  |
| 32        | FF     | 41.41  | 54.88  | 58.28  | 59.63  | 60.40  |
|           | MH     | 41.40  | 54.91  | 58.30  | 59.65  | 60.45  |
| 64        | FF     | 41.25  | 54.83  | 58.29  | 59.82  | 60.61  |
|           | MH     | 41.28  | 54.80  | 58.32  | 59.77  | 60.69  |
| 128       | FF     | 41.36  | 54.90  | 58.50  | 60.05  | 60.90  |
|           | MH     | 41.38  | 54.95  | 58.50  | 60.06  | 60.83  |
| 256       | FF     | 41.36  | 54.90  | 58.50  | 60.05  | 60.90  |
|           | MH     | 41.38  | 54.95  | 58.50  | 60.06  | 60.83  |
| 512       | FF     | 41.36  | 55.05  | 58.70  | 60.19  | 61.02  |
|           | MH     | 41.34  | 55.14  | 58.78  | 60.40  | 61.18  |
| 1024      | FF     | 41.32  | 55.20  | 58.85  | 60.46  | 61.38  |
|           | MH     | 41.31  | 55.24  | 58.86  | 60.42  | 61.34  |
| 2048      | FF     | 41.18  | 55.09  | 58.77  | 60.38  | 61.34  |
|           | MH     | 41.16  | 55.10  | 58.77  | 60.40  | 61.28  |

on FLUID. We observe that MRL provides up to 2% accuracy higher on novel classes in the tail of the distribution, without sacrificing accuracy on other classes. Additionally we find the accuracy between low-dimensional and high-dimensional representations is marginal for pretrain classes. For example, the 64-dimensional MRL performs  $\sim 1\%$  lower in accuracy compared to the 2048-dimensional counterpart on pretrain-head classes (84.46% vs 85.60%). However for novel-tail classes the gap is far larger (6.22% vs 12.88%). We hypothesize that the higher-dimensional representations are required to differentiate the classes when few training examples of each are known. This results provides further evidence that different tasks require varying capacity based on their difficulty.

Table 16: Accuracy for all methods with varying feature dimension size on the FLUID [83] benchmark. The novel/pretrain categories indicates whether classes were present during ImageNet pretraining and head/tail indicates classes that have greater/less than 50 examples in the streaming test set. We observe that MRL performs better than the baseline on novel tail classes by  $\sim 2\%$  on average.

| Rep. Size | Method | Pretrain<br>- Head (>50) | Novel<br>- Head (>50) | Pretrain<br>- Tail (<50) | Novel<br>- Tail (<50) | Mean Per Class<br>Acc. | Acc.         |
|-----------|--------|--------------------------|-----------------------|--------------------------|-----------------------|------------------------|--------------|
| 8         | FF     | 68.04                    | <b>11.30</b>          | 33.18                    | <b>0.36</b>           | 16.29                  | 28.47        |
|           | MRL    | <b>71.75</b>             | 10.70                 | <b>38.29</b>             | 0.19                  | <b>17.15</b>           | <b>29.34</b> |
|           | MRL-E  | 57.40                    | 6.25                  | 23.14                    | 0.04                  | 11.78                  | 22.81        |
| 16        | FF     | 80.74                    | <b>19.12</b>          | <b>63.29</b>             | <b>2.78</b>           | <b>25.65</b>           | <b>37.61</b> |
|           | MRL    | <b>81.79</b>             | 17.90                 | 61.39                    | 1.95                  | 24.73                  | <u>37.59</u> |
|           | MRL-E  | 79.08                    | 9.15                  | 60.33                    | 0.08                  | 20.45                  | 30.24        |
| 32        | FF     | <b>83.67</b>             | <b>24.30</b>          | <b>66.66</b>             | <b>4.23</b>           | <b>28.86</b>           | <b>42.40</b> |
|           | MRL    | <u>83.46</u>             | 23.26                 | 65.82                    | 3.75                  | 28.16                  | 41.90        |
|           | MRL-E  | 81.42                    | 10.47                 | 68.01                    | 0.23                  | 22.31                  | 32.17        |
| 64        | FF     | 84.12                    | 27.49                 | 68.20                    | 5.17                  | 30.64                  | 45.18        |
|           | MRL    | 84.46                    | 27.61                 | 67.59                    | 6.22                  | 31.03                  | 45.35        |
|           | MRL-E  | 82.57                    | 13.23                 | 70.18                    | 0.52                  | 23.83                  | 34.74        |
| 128       | FF     | 84.87                    | 29.96                 | 68.79                    | 5.54                  | 31.84                  | 47.06        |
|           | MRL    | 84.88                    | 30.86                 | 68.58                    | 8.41                  | 33.23                  | 47.79        |
|           | MRL-E  | 82.76                    | 18.93                 | 64.46                    | 2.22                  | 25.75                  | 39.19        |
| 256       | FF     | 84.77                    | 32.78                 | 69.96                    | 7.21                  | 33.65                  | 49.15        |
|           | MRL    | 85.10                    | 32.91                 | 69.39                    | 9.99                  | 34.74                  | 49.39        |
|           | MRL-E  | 82.96                    | 22.63                 | 64.55                    | 3.59                  | 27.64                  | 41.96        |
| 512       | FF     | 85.62                    | 35.27                 | 70.27                    | 9.05                  | 35.42                  | 51.14        |
|           | MRL    | 85.62                    | 34.67                 | 70.24                    | 11.43                 | 36.11                  | 50.79        |
|           | MRL-E  | 82.86                    | 25.62                 | 64.34                    | 4.99                  | 29.22                  | 44.20        |
| 1024      | FF     | 86.30                    | 37.49                 | 71.12                    | 10.92                 | 37.14                  | 52.88        |
|           | MRL    | 85.64                    | 35.88                 | 70.02                    | 12.19                 | 36.80                  | 51.58        |
|           | MRL-E  | 83.03                    | 27.78                 | 64.58                    | 6.32                  | 30.57                  | 45.71        |
| 2048      | FF     | 86.40                    | 37.09                 | 71.74                    | 10.77                 | 37.04                  | 52.67        |
|           | MRL    | 85.60                    | 36.83                 | 70.34                    | 12.88                 | 37.46                  | 52.18        |
|           | MRL-E  | 83.01                    | 29.99                 | 65.37                    | 7.60                  | 31.97                  | 47.16        |

## H Robustness Experiments

We evaluate the robustness of MRL models on out-of-domain datasets (ImageNetV2/R/A/Sketch) and compare them to the FF baseline. Each of these datasets is described in Appendix B. The results in Table 17 demonstrate that learning Matryoshka Representations does not hurt out-of-domain generalization relative to FF models, and Matryoshka Representations in fact improve the performance on ImageNet-A. For a ALIGN-MRL model, we examine the the robustness via zero-shot retrieval on out-of-domain datasets, including ObjectNet, in Table 18.

Table 17: Top-1 classification accuracy on out-of-domain datasets (ImageNet-V2/R/A/Sketch) to examine robustness of Matryoshka Representation Learning. Note that these results are without any fine tuning on these datasets.

| Rep. Size | ImageNet-V1 |       |       | ImageNet-V2 |       |       | ImageNet-R |       |       | ImageNet-A |       |      | ImageNet-Sketch |       |       |
|-----------|-------------|-------|-------|-------------|-------|-------|------------|-------|-------|------------|-------|------|-----------------|-------|-------|
|           | FF          | MRL-E | MRL   | FF          | MRL-E | MRL   | FF         | MRL-E | MRL   | FF         | MRL-E | MRL  | FF              | MRL-E | MRL   |
| 8         | 65.86       | 56.92 | 67.46 | 54.05       | 47.40 | 55.59 | 24.60      | 22.98 | 23.57 | 2.92       | 3.63  | 3.39 | 17.73           | 15.07 | 17.98 |
| 16        | 73.10       | 72.38 | 73.80 | 60.52       | 60.48 | 61.71 | 28.51      | 28.45 | 28.85 | 3.00       | 3.55  | 3.59 | 21.70           | 20.38 | 21.77 |
| 32        | 74.68       | 74.80 | 75.26 | 62.24       | 62.23 | 63.05 | 31.28      | 30.79 | 31.47 | 2.60       | 3.65  | 3.57 | 22.03           | 21.87 | 22.48 |
| 64        | 75.45       | 75.48 | 76.17 | 63.51       | 63.15 | 63.99 | 32.96      | 32.13 | 33.39 | 2.87       | 3.99  | 3.76 | 22.13           | 22.56 | 23.43 |
| 128       | 75.47       | 76.05 | 76.46 | 63.67       | 63.52 | 64.69 | 33.93      | 33.48 | 34.54 | 2.81       | 3.71  | 3.73 | 22.73           | 22.73 | 23.70 |
| 256       | 75.78       | 76.31 | 76.66 | 64.13       | 63.80 | 64.71 | 34.80      | 33.91 | 34.85 | 2.77       | 3.65  | 3.60 | 22.63           | 22.88 | 23.59 |
| 512       | 76.30       | 76.48 | 76.82 | 64.11       | 64.09 | 64.78 | 35.53      | 34.20 | 34.97 | 2.37       | 3.57  | 3.59 | 23.41           | 22.89 | 23.67 |
| 1024      | 76.74       | 76.60 | 76.93 | 64.43       | 64.20 | 64.95 | 36.06      | 34.22 | 34.99 | 2.53       | 3.56  | 3.68 | 23.44           | 22.98 | 23.72 |
| 2048      | 77.10       | 76.65 | 76.95 | 64.69       | 64.17 | 64.93 | 37.10      | 34.29 | 35.07 | 2.93       | 3.49  | 3.59 | 24.05           | 23.01 | 23.70 |

Table 18: Zero-shot image classification of a ALIGN-MRL model on ImageNet-V1/V2/R/A, and ObjectNet.

| Rep. Size | V1    | V2    | A     | R     | ObjectNet |
|-----------|-------|-------|-------|-------|-----------|
| 12        | 30.57 | 23.98 | 14.59 | 24.24 | 25.52     |
| 24        | 45.64 | 37.71 | 22.75 | 46.40 | 35.89     |
| 48        | 53.84 | 46.16 | 28.88 | 60.71 | 42.76     |
| 96        | 58.31 | 51.34 | 33.21 | 70.12 | 45.20     |
| 192       | 60.95 | 53.56 | 36.10 | 74.41 | 48.24     |
| 384       | 62.06 | 54.77 | 37.95 | 76.51 | 49.10     |
| 768       | 62.26 | 55.15 | 37.84 | 76.73 | 49.26     |
| Baseline  | 66.39 | 59.57 | 39.97 | 80.49 | 51.60     |

## I In Practice Costs

All approximate NN search experiments via HNSW32 were run on an Intel Xeon 2.20GHz CPU with 24 cores. All exact search experiments were run with CUDA 11.0 on 2xA100-SXM4 NVIDIA GPUs with 40G RAM each.

**MRL models** As MRL makes minimal modifications to the ResNet50 model in the final fc layer via multiple heads for representations at various scales, it has only an 8MB storage overhead when compared to a standard ResNet50 model. MRL-E has no storage overhead as it has a shared head for logits at the final fc layer.

Table 19: Retrieval k-NN wall clock search times (s) over entire valset (query set) of ImageNet-1K and ImageNet-4K, containing 50K and 200K samples respectively.

| Rep. Size | ImageNet-1K |        | ImageNet-4K |        |
|-----------|-------------|--------|-------------|--------|
|           | ExactL2     | HNSW32 | ExactL2     | HNSW32 |
| 8         | 0.60        | 0.14   | 35.70       | 1.17   |
| 16        | 0.57        | 0.18   | 36.16       | 1.65   |
| 32        | 0.60        | 0.20   | 36.77       | 1.75   |
| 64        | 0.66        | 0.24   | 27.88       | 2.21   |
| 128       | 0.86        | 0.32   | 30.10       | 4.15   |
| 256       | 1.29        | 0.46   | 34.97       | 3.39   |
| 512       | 2.17        | 0.68   | 46.97       | 4.83   |
| 1024      | 3.89        | 1.05   | 70.59       | 7.14   |
| 2048      | 7.31        | 2.05   | 117.78      | 13.43  |

Table 20: FAISS [42] index size and build times for exact k-NN search with L2 Distance metric and approximate k-NN search with HNSW32 [55].

| Rep. Size | Exact Search    |                      |                 |                      | HNSW32          |                      |                 |                      |
|-----------|-----------------|----------------------|-----------------|----------------------|-----------------|----------------------|-----------------|----------------------|
|           | ImageNet-1K     |                      | ImageNet-4K     |                      | ImageNet-1K     |                      | ImageNet-4K     |                      |
|           | Index Size (MB) | Index Build Time (s) | Index Size (MB) | Index Build Time (s) | Index Size (MB) | Index Build Time (s) | Index Size (MB) | Index Build Time (s) |
| 8         | 40              | 0.04                 | 131             | 0.33                 | 381             | 4.87                 | 1248            | 24.04                |
| 16        | 80              | 0.08                 | 263             | 0.27                 | 421             | 6.15                 | 1379            | 33.31                |
| 32        | 160             | 0.16                 | 525             | 0.52                 | 501             | 6.80                 | 1642            | 37.41                |
| 64        | 320             | 0.38                 | 1051            | 1.05                 | 661             | 8.31                 | 2167            | 47.23                |
| 128       | 641             | 0.64                 | 2101            | 2.10                 | 981             | 11.73                | 3218            | 89.87                |
| 256       | 1281            | 1.27                 | 4202            | 4.20                 | 1622            | 17.70                | 5319            | 102.84               |
| 512       | 2562            | 2.52                 | 8404            | 8.39                 | 2903            | 27.95                | 9521            | 158.47               |
| 1024      | 5125            | 5.10                 | 16808           | 17.20                | 5465            | 44.02                | 17925           | 236.30               |
| 2048      | 10249           | 10.36                | 33616           | 41.05                | 10590           | 86.15                | 34733           | 468.18               |

**Retrieval** Exact search has a search time complexity of  $O(dkN)$ , and HNSW has a search time complexity of  $O(dk \log(N))$ , where  $N$  is the database size,  $d$  is the representation size, and  $k$  is the shortlist length. To examine real-world performance, we tabulate wall clock search time for every query in the ImageNet-1K and ImageNet-4K validation sets over all representation size  $d$  in Table 19 for both Exact Search and HNSW32, and ablate wall clock query time over shortlist length  $k$  on the

Table 21: Retrieval k-NN wall clock search times (s) over entire valset (query set) of ImageNet-1K over various shortlist lengths.

| Index    | k = 50 | k = 100 | k = 200 | k = 500 | k = 1000 | k = 2048 |
|----------|--------|---------|---------|---------|----------|----------|
| Exact L2 | 0.4406 | 0.4605  | 0.5736  | 0.6060  | 1.2781   | 2.7047   |
| HNSW32   | 0.1193 | 0.1455  | 0.1833  | 0.2145  | 0.2333   | 0.2670   |

ImageNet-1K validation set in Table 21. The wall clock time to build the index and the index size is also shown in Table 20.

## J Analysis of Model Disagreement

**Class Trends** *Does increasing representation size necessarily help improve the classification performance of all classes in ImageNet-1K?* We studied this question by examining trends in performance with increasing representation size from  $d = 8, \dots, 2048$ . For MRL models, we observed that 244 classes showed a monotonic improvement in performance with increasing  $d$ , 177 classes first improved but then observed a slight dip (one or two misclassifications), 49 classes showed a decline first and then an improvement, and the remaining classes did not show a clear trend. When we repeated this experiment with independently trained FF models, we noticed that 950 classes did not show a clear trend. This motivated us to leverage the disagreement as well as gradual improvement of accuracy at different representation sizes by training Matryoshka Representations. Figure 10 also showcases the progression of relative per-class accuracy distribution compared to the 2048 dimensional model. This also shows that some instances and classes could benefit from the lower-dimensional representations.

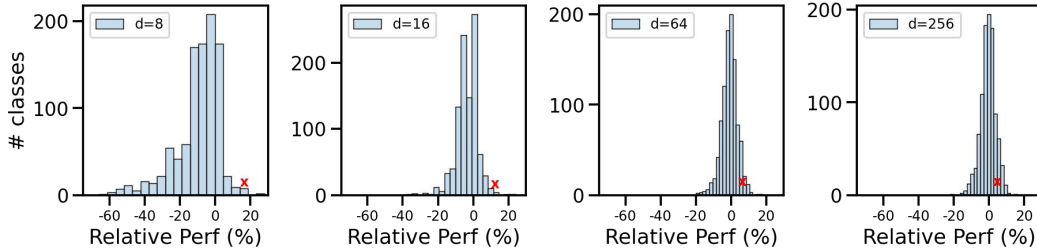

Figure 10: Progression of relative per-class accuracy vs MRL-2048. As the dimensionality increases, the spread shrinks while the class marked (x) (Madagascar cat) loses accuracy.

**Discussion of Oracle Accuracy** Based on our observed model disagreements for different representation sizes  $d$ , we defined an optimal *oracle* accuracy [52] for MRL. We labeled an image as correctly predicted if classification using any representation size was right. The percentage of total samples of ImageNet-1K that were correctly predicted for each representation size  $d$  is shown in Table 22. This defined an upper bound on the performance of MRL models, as 18.52% of the ImageNet-1K validation set were incorrectly predicted  $\forall d \in \{8, 2048\}$ . We show the oracle performance on MRL models for ImageNet-1K/V2/A/R/Sketch datasets in Table 23.

Table 22: Percentage of ImageNet-1K validation set that is correctly predicted by each representation size. We note that 18.46% of the samples cannot be correctly predicted by any representation size. The remaining 81.54% constitutes the oracle accuracy.

| Rep. Size           | 8     | 16   | 32   | 64   | 128  | 256  | 512  | 1024 | 2048 | Always Wrong |
|---------------------|-------|------|------|------|------|------|------|------|------|--------------|
| Correctly Predicted | 67.46 | 8.78 | 2.58 | 1.35 | 0.64 | 0.31 | 0.20 | 0.12 | 0.06 | 18.52        |

In an attempt to derive an optimal routing policy to emulate oracle accuracy, we designed the adaptive classification via cascading method as discussed in Appendix D.1. This led to an interesting

Table 23: Oracle classification accuracy of various evaluation datasets for ResNet50–MRL model trained on ImageNet-1K.

| Top-1      | ImageNetV1 | ImageNetV2 | ImageNet-A | ImageNet-R | ImageNet-Sketch |
|------------|------------|------------|------------|------------|-----------------|
| FF-2048    | 76.9       | 64.9       | 3.6        | 35.1       | 23.7            |
| MRL–Oracle | 81.5       | 70.6       | 8.7        | 39.8       | 28.9            |

observation on the expected dimensionality for 76.30% top-1 classification accuracy being just  $d \sim 37$ . We leave the design and learning of a more accurate policy for future work.

**Grad-CAM Examples** We analyzed the nature of model disagreement across representation sizes with MRL models with the help of Grad-CAM visualization [71]. We observe there are certain classes in ImageNet-1K such as "tools", "vegetables" and "meat cutting knife" which are at times around multiple objects and a cluttered environment. In such scenarios, we observed that smaller representation size models would often get confused due to other objects and fail to extract the object of interest which generated the correct label. We also observed a different nature of disagreement arising when the models got confused within the same superclass. For example, ImageNet-1K has multiple "snake" classes, and models often confuse a snake image for an incorrect species of snake.

**Superclass Performance** To quantify the performance of MRL model on ImageNet-1K superclasses, we create a 30 superclass subset of the validation set based on wordnet hierarchy (Table 24). These 30 superclasses contain 467 out of 1000 classes, and we have an additional class named reject, when an image does not belong to any of the superclass. Table 25 quantifies the performance with different representation size; we see that there is a jump in performance from 8 to 16 sized representations because 8 dimensional model was confusing images from superclass vegetable with reject token. We further show 8 of those 30 superclasses and plot their improvement with size in Figure 11.

Table 24: 30 Superclasses in ImageNet-1K corresponding to the performance in Table 25.

|                     |               |                    |                      |                 |
|---------------------|---------------|--------------------|----------------------|-----------------|
| insect              | motor vehicle | artiodactyl        | vegetable            | game equipment  |
| terrier             | serpent       | machine            | measuring device     | sheepdog        |
| protective covering | sporting dog  | vessel, watercraft | building             | lizard          |
| garment             | hound         | monkey             | home appliance       | wind instrument |
| vessel              | fish          | nourishment        | electronic equipment | oscine          |
| furniture           | wading bird   | tool               | canine               | mechanism       |

Table 25: Performance of MRL model on 31-way classification (1 extra class is for reject token). We see that there is a jump in performance from representation size 8 to 16 because 8 dimensional model was confusing images from superclass vegetable with reject token.

| Rep. Size | 8     | 16    | 32    | 64    | 128   | 256   | 512   | 1024  | 2048  |
|-----------|-------|-------|-------|-------|-------|-------|-------|-------|-------|
| MRL       | 85.57 | 88.67 | 89.48 | 89.82 | 89.97 | 90.11 | 90.18 | 90.22 | 90.21 |

## K Ablation Studies

### K.1 MRL Training Paradigm

**Nesting as Finetuning.** To observe if nesting can be induced in models that were not explicitly trained with nesting from scratch, we load a pretrained FF2048 ResNet50 model and initialize a new MRL layer, as defined in Algorithm 2, Appendix C. Different layers of the backbone are then unfrozen to observe how much non-linearity in the form of unfrozen conv layers needs to be present to enforce nesting into a pretrained FF model. A description of these layers can be found in the ResNet50 architecture [27]. All models are finetuned with the FFCV pipeline, with same training configuration as in the end-to-end training aside from changing  $\text{lr} = 0.1$  and  $\text{epochs} = 10$ . We observe that finetuning the linear layer alone is insufficient for learning Matryoshka Representations at lower dimensionalities. Adding more and more non-linear conv+ReLU layers steadily improves



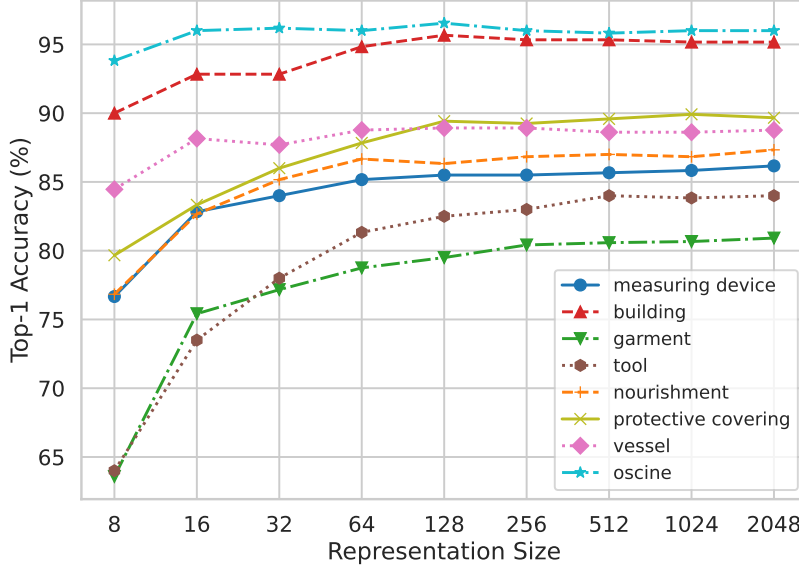

Figure 11: Improvement of within superclass classification with increasing representation size. We observe that superclasses such as “oscine (songbird)” have a clear distinction between the object and background and thus predictions using representation size of 8 also lead to a good performance.

Table 26: Top-1 classification Accuracy (%) on ImageNet-1K of various ResNet50 models which are finetuned on pretrained FF2048 model. Different layers of the backbone are then unfrozen to observe how much non-linearity in the form of unfrozen conv layers needs to be present to enforce nesting into a pretrained FF model. We observed that adding more and more non-linearities is able to induce nesting to a reasonable extent even if the model was not pretrained with nesting in mind.

| Rep. Size | 4.2 conv3, fc | 4.2 conv3, conv2, fc | 4.2 full, fc | fc    | All (MRL) |
|-----------|---------------|----------------------|--------------|-------|-----------|
| 8         | 36.11         | 54.78                | 60.02        | 5.15  | 66.63     |
| 16        | 58.42         | 67.26                | 70.10        | 13.79 | 73.53     |
| 32        | 67.81         | 71.62                | 72.84        | 32.52 | 75.03     |
| 64        | 72.42         | 73.61                | 74.29        | 52.66 | 75.82     |
| 128       | 74.41         | 74.67                | 75.03        | 64.60 | 76.30     |
| 256       | 75.30         | 75.23                | 75.38        | 69.29 | 76.47     |
| 512       | 75.96         | 75.47                | 75.64        | 70.51 | 76.65     |
| 1024      | 76.18         | 75.70                | 75.75        | 70.19 | 76.76     |
| 2048      | 76.44         | 75.96                | 75.97        | 69.72 | 76.80     |

classification accuracy of  $d = 8$  from 5% to 60% after finetuning, which is only 6% less than training MRL end-to-end for 40 epochs. This difference is successively less pronounced as we increase dimensionality past  $d = 64$ , to within 1.5% for all larger dimensionalities. The full results of this ablation can be seen in Table 26.

**Relative Importance.** We perform an ablation of MRL over the relative importance,  $c_m$ , of different nesting dimensions  $m \in \mathcal{M}$ , as defined in Sec. 3. In an attempt to improve performance at lower dimensionalities, we boost the relative importance  $c_m$  of training loss at lower dimensions as in Eq. 1 with two models, MRL-8boost and MRL-8+16boost. The MRL-8boost model has  $c_{m \in \mathcal{M}} = [2, 1, 1, 1, 1, 1, 1, 1, 1]$  and the MRL-8+16boost model has  $c_{m \in \mathcal{M}} = [2, 1.5, 1, 1, 1, 1, 1, 1, 1]$ . The relative importance list  $c_{m \in \mathcal{M}}$  has a 1-to-1 correspondence with nesting dimension set  $\mathcal{M}$ . In Table 27, we observe that MRL-8boost improves top-1 accuracy by 3% at  $d = 8$ , and also improves top-1 of all representation scales from 16 to 256 over MRL, while only hurting the performance at 512 to 2048 representation scales by a maximum of 0.1%. This suggests that the relative importance  $c_m$  can be tuned/set for optimal accuracy for all  $m \in \mathcal{M}$ , but we leave this extension for future work.

Table 27: An ablation over boosting training loss at lower nesting dimensions, with top-1 and top-5 accuracy (%). The models are described in Appendix K.1.

| Model     | MRL          |       | MRL-8boost   |       | MRL-8+16boost |       |
|-----------|--------------|-------|--------------|-------|---------------|-------|
| Rep. Size | Top-1        | Top-5 | Top-1        | Top-5 | Top-1         | Top-5 |
| 8         | 66.63        | 84.66 | <b>69.53</b> | 86.19 | 69.24         | 85.96 |
| 16        | 73.53        | 89.52 | 73.86        | 89.44 | <b>73.91</b>  | 89.55 |
| 32        | 75.03        | 91.31 | <b>75.28</b> | 91.21 | 75.10         | 91.14 |
| 64        | 75.82        | 92.27 | <b>75.84</b> | 92.22 | 75.67         | 92.06 |
| 128       | <b>76.30</b> | 92.82 | 76.28        | 92.74 | 76.07         | 92.52 |
| 256       | 76.47        | 93.02 | <b>76.48</b> | 92.97 | 76.22         | 92.72 |
| 512       | <b>76.65</b> | 93.13 | 76.56        | 93.09 | 76.35         | 92.85 |
| 1024      | <b>76.76</b> | 93.22 | 76.71        | 93.21 | 76.39         | 92.98 |
| 2048      | <b>76.80</b> | 93.32 | 76.76        | 93.28 | 76.52         | 93.05 |

Table 28: Adaptive retrieval ablation over shortlist length  $k$  for  $D_s = 16$ ,  $D_r = 2048$  on ImageNet-1K with exact search.

| Shortlist Length | P@1          | mAP@10       | mAP@25 | mAP@50 | mAP@100 | P@10  | P@25  | P@50  | P@100 |
|------------------|--------------|--------------|--------|--------|---------|-------|-------|-------|-------|
| 100              | 70.88        | 65.19        | 63.62  | 62.59  | 61.24   | 69.96 | 69.24 | 68.53 | 67.20 |
| 200              | 70.90        | <b>65.27</b> | 63.73  | 62.82  | 61.97   | 70.10 | 69.44 | 68.90 | 68.21 |
| 400              | 70.94        | 65.26        | 63.71  | 62.81  | 62.03   | 70.15 | 69.51 | 69.02 | 68.47 |
| 800              | 70.96        | 65.23        | 63.64  | 62.69  | 61.85   | 70.16 | 69.52 | 69.02 | 68.45 |
| 1600             | 70.96        | 65.20        | 63.58  | 62.58  | 61.66   | 70.16 | 69.5  | 68.97 | 68.36 |
| 2048             | <b>70.97</b> | 65.20        | 63.57  | 62.58  | 61.64   | 70.16 | 69.5  | 68.97 | 68.35 |

## K.2 Retrieval

**Adaptive Retrieval.** To examine the effect of increasing shortlist lengths on search time, a reranking ablation over shortlist lengths is also performed for  $D_s = 16$  and  $D_r = 2048$  over ImageNet-1K in Table 28, and over ImageNet-4K in Table 29.

Table 29: Adaptive retrieval ablation over shortlist length  $k$  for  $D_s = 16$ ,  $D_r = 2048$  on ImageNet-4K with exact search.

| Shortlist Length | P@1          | mAP@10       | mAP@25 | mAP@50 | mAP@100 | P@10  | P@25  | P@50  | P@100 |
|------------------|--------------|--------------|--------|--------|---------|-------|-------|-------|-------|
| 100              | 27.70        | 14.38        | 10.62  | 8.26   | 6.07    | 20.12 | 16.87 | 14.29 | 11.26 |
| 200              | 28.56        | 15.21        | 11.43  | 9.11   | 7.12    | 21.23 | 18.13 | 15.73 | 13.27 |
| 400              | 29.34        | 15.83        | 12.06  | 9.76   | 7.79    | 22.08 | 19.09 | 16.83 | 14.54 |
| 800              | 29.86        | 16.30        | 12.53  | 10.23  | 8.26    | 22.72 | 19.83 | 17.65 | 15.45 |
| 1600             | 30.24        | 16.63        | 12.86  | 10.56  | 8.60    | 23.18 | 20.36 | 18.23 | 16.11 |
| 2048             | <b>30.35</b> | <b>16.73</b> | 12.96  | 10.65  | 8.69    | 23.31 | 20.50 | 18.40 | 16.30 |
